# Supplementary material for: Identifying Drug Response by Combining Measurements of the Membrane Potential, the Cytosolic Calcium Concentration, and the Extracellular Potential in Microphysiological Systems
Source: PubMed Central journal article supplement (PMC7898238; doi:10.3389/fphar.2020.569489), 2021-02-08
Supplement: datasheet1.pdf [file datasheet1.pdf]

# Supplementary information

## S1 Base model formulation

In this note, the formulation of the hiPSC-CM base model used in the simulations of the paper will be described. The model formulation can also be found in [1]. In the formulation, the membrane potential ( $v$ ) is given in units of mV, and the  $\text{Ca}^{2+}$  concentrations are given in units of mM. Furthermore, the currents are given in units of  $\mu\text{A}/\mu\text{F}$ , and the  $\text{Ca}^{2+}$  fluxes are given in mmol/ms per total cell volume (i.e., in units of mM/ms). Time is expressed in ms. The parameters of the model are given in Tables S1–S6.

### S1.1 Total membrane current

The total currents across the membrane is given by

$$\begin{aligned} I_{\text{ion}} = & I_{\text{Na}} + I_{\text{NaL}} + I_{\text{CaL}} + I_{\text{to}} + I_{\text{Kr}} + I_{\text{Ks}} + I_{\text{K1}} \\ & + I_{\text{NaCa}} + I_{\text{NaK}} + I_{\text{pCa}} + I_{\text{bCl}} + I_{\text{bCa}} + I_{\text{f}}, \end{aligned} \quad (1)$$

where  $I_{\text{Na}}$ ,  $I_{\text{NaL}}$ ,  $I_{\text{CaL}}$ ,  $I_{\text{to}}$ ,  $I_{\text{Kr}}$ ,  $I_{\text{Ks}}$ ,  $I_{\text{K1}}$ ,  $I_{\text{NaCa}}$ ,  $I_{\text{NaK}}$ ,  $I_{\text{pCa}}$ ,  $I_{\text{bCl}}$ ,  $I_{\text{bCa}}$ , and  $I_{\text{f}}$  are membrane currents that will be specified below.

In pure ODE simulations of the base model, the membrane potential is governed by

$$\frac{dv}{dt} = -(I_{\text{ion}} + I_{\text{stim}}), \quad (2)$$

where  $I_{\text{stim}}$  is an applied stimulus current. Note here that all the currents in  $I_{\text{ion}}$  are scaled by the specific membrane capacitance,  $C_m$  in units of  $\mu\text{F}/\text{cm}^2$ . Therefore,  $I_{\text{ion}}$  could be written as  $I_{\text{ion}} = \frac{1}{C_m} \tilde{I}_{\text{ion}}$ , where  $\tilde{I}_{\text{ion}}$  is given in units of  $\mu\text{A}/\text{cm}^2$ .

In bidomain-base model simulations,  $I_{\text{ion}}$  is included in the bidomain model

$$\chi C_m \left( \frac{\partial v}{\partial t} + I_{\text{ion}}(v, s) + I_{\text{stim}} \right) = \nabla \cdot (\sigma_i \nabla v) + \nabla \cdot (\sigma_i \nabla u_e), \quad (3)$$

$$0 = \nabla \cdot (\sigma_i \nabla v) + \nabla \cdot ((\sigma_i + \sigma_e) \nabla u_e), \quad (4)$$

$$\frac{\partial s}{\partial t} = F(v, s). \quad (5)$$

## S1.2 Membrane currents

In general, the currents through the voltage-gated ion channels on the membrane are given on the form

$$I = go(v - E),$$

where  $g$  is the channel conductance,  $v$  is the membrane potential and  $E$  is the equilibrium potential of the channel. Moreover,  $o = \prod_i z_i$  is the open probability of the channels, where  $z_i$  are gating variables, either given as an explicit function of  $v$  or governed by equations of the form

$$z_i' = \frac{1}{\tau_{z_i}} (z_{i,\infty} - z_i). \quad (6)$$

The parameters  $\tau_{z_i}$  and  $z_{i,\infty}$  for each of the gating variables of the base model are specified in Table S7.

### S1.2.1 Fast sodium current

The formulation of the fast sodium current is based on the model in [2], adjusted to support slower upstroke velocities that are more similar to those observed in the optical measurements of hiPSC-CMs. The current is given by

$$I_{\text{Na}} = g_{\text{Na}} o_{\text{Na}} (v - E_{\text{Na}}). \quad (7)$$

Here, the open probability is given by

$$o_{\text{Na}} = m^3 j, \quad (8)$$

where  $m$  and  $j$  are gating variables governed by equations of the form (6).

### S1.2.2 Late sodium current

The formulation of the late sodium current,  $I_{\text{NaL}}$ , is based on [3], and the current is given by

$$I_{\text{NaL}} = g_{\text{NaL}} o_{\text{NaL}} (v - E_{\text{Na}}). \quad (9)$$

Here, the open probability is given by

$$o_{\text{NaL}} = m_L h_L, \quad (10)$$

where  $m_L$  and  $h_L$  are gating variables governed by equations of the form (6).

### S1.2.3 Transient outward potassium current

The formulation of the transient outward potassium current,  $I_{\text{to}}$ , is based on [4], and the current is given by

$$I_{\text{to}} = g_{\text{to}} o_{\text{to}} (v - E_{\text{to}}). \quad (11)$$

Here, the open probability is given by

$$o_{\text{to}} = q_{\text{to}} r_{\text{to}}, \quad (12)$$

where  $q_{\text{to}}$  and  $r_{\text{to}}$  are gating variables governed by equations of the form (6).

### S1.2.4 Rapidly activating potassium current

The formulation of the rapidly activating potassium current,  $I_{\text{Kr}}$ , is based on [4], and the current is given by

$$I_{\text{Kr}} = g_{\text{Kr}} o_{\text{Kr}} (v - E_{\text{K}}). \quad (13)$$

Here,

$$o_{\text{Kr}} = x_{\text{Kr1}} x_{\text{Kr2}}, \quad (14)$$

where the dynamics of  $x_{\text{Kr1}}$  and  $x_{\text{Kr2}}$  are governed by equations of the form (6).

### S1.2.5 Slowly activating potassium current

The formulation of the slowly activating potassium current,  $I_{\text{Ks}}$ , is based on [2], and the current is given by

$$I_{\text{Ks}} = g_{\text{Ks}} o_{\text{Ks}} (v - E_{\text{Ks}}). \quad (15)$$

Here,

$$o_{\text{Ks}} = x_{\text{Ks}}^2, \quad (16)$$

where the dynamics of  $x_{\text{Ks}}$  is governed by an equation of the form (6).

### S1.2.6 Inward rectifier potassium current

The formulation of the inward rectifier potassium current,  $I_{K1}$ , is based on [2], and the current is given by

$$I_{K1} = g_{K1} o_{K1} (v - E_K). \quad (17)$$

Here,

$$o_{K1} = \frac{a_{K1}}{a_{K1} + b_{K1}}, \quad (18)$$

$$a_{K1} = \frac{1}{1 + e^{0.2(v - E_K - 59)}}, \quad (19)$$

$$b_{K1} = \frac{0.5e^{0.08(v - E_K + 5)} + e^{0.06(v - E_K - 594)}}{1 + e^{-0.5(v - E_K + 5)}}. \quad (20)$$

### S1.2.7 Hyperpolarization activated funny current

The formulation for the hyperpolarization activated funny current,  $I_f$ , is based on [4], and the current is given by

$$I_f = g_f o_f (v - E_f). \quad (21)$$

Here,

$$o_f = x_f, \quad (22)$$

where the dynamics of  $x_f$  is governed by an equation of the form (6).

### S1.2.8 L-type calcium current

The formulation for the L-type calcium current,  $I_{CaL}$ , is based on the formulation in [2], and the current is given by

$$I_{CaL} = g_{CaL} o_{CaL} \frac{(2F)^2 v}{RT} \frac{0.341 c_d e^{\frac{2Fv}{RT}} - 0.341 c_e}{e^{\frac{2Fv}{RT}} - 1}. \quad (23)$$

Here,

$$o_{CaL} = df(1 - f_{Ca}), \quad (24)$$

where the dynamics of  $d$ ,  $f$  and  $f_{Ca}$  are governed by equations of the form (6).

### S1.2.9 Background currents

The formulation of the background currents,  $I_{bCa}$  and  $I_{bCl}$ , are based on [2], and the currents are given by

$$I_{bCa} = g_{bCa}(v - E_{Ca}), \quad (25)$$

$$I_{bCl} = g_{bCl}(v - E_{Cl}). \quad (26)$$

### S1.2.10 Sodium-calcium exchanger

The formulation of the sodium-calcium exchanger current,  $I_{NaCa}$ , is based on [2], and the current is given by

$$I_{NaCa} = \bar{I}_{NaCa} \frac{e^{\frac{\nu Fv}{RT}} [Na^+]_i^3 c_e - e^{\frac{(\nu-1)Fv}{RT}} [Na^+]_e^3 c_{sl}}{s_{NaCa} \left(1 + \left(\frac{K_{act}}{c_{sl}}\right)^2\right) \left(1 + k_{sat} e^{\frac{(\nu-1)Fv}{RT}}\right)}. \quad (27)$$

Here,

$$s_{NaCa} = K_{Ca,i} [Na^+]_e^3 \left(1 + \left(\frac{[Na^+]_i}{K_{Na,i}}\right)^3\right) + K_{Na,e}^3 c_{sl} \left(1 + \frac{c_{sl}}{K_{Ca,i}}\right) + K_{Ca,e} [Na^+]_i^3 + [Na^+]_i^3 c_e + [Na^+]_e^3 c_{sl}.$$

### S1.2.11 Sarcolemmal calcium pump

The formulation of the current through the sarcolemmal calcium pump,  $I_{pCa}$ , is based on [2], and the current is given by

$$I_{pCa} = \bar{I}_{pCa} \frac{c_{sl}^2}{K_{pCa}^2 + c_{sl}^2}. \quad (28)$$

### S1.2.12 Sodium-potassium pump

The current through the sodium-potassium pump,  $I_{NaK}$ , is based on [2], and the current is given by

$$I_{NaK} = \bar{I}_{NaK} \frac{f_{NaK}}{1 + \left(\frac{K_{Na,i}^{NaK}}{[Na^+]_i}\right)^4} \frac{[K^+]_e}{[K^+]_e + K_{K,e}}. \quad (29)$$

Here,

$$f_{NaK} = \frac{1}{1 + 0.12e^{-0.1\frac{Fv}{RT}}} + \frac{0.037}{7} \left(e^{\frac{[Na^+]_e}{67}} - 1\right) e^{-\frac{Fv}{RT}}. \quad (30)$$

### S1.3 Calcium dynamics

The calcium dynamics of the base model are governed by the following system of equations:

$$\frac{dc_d}{dt} = \frac{1}{V_d}(J_{\text{CaL}} - J_d^b - J_d^c), \quad \frac{db_d}{dt} = \frac{1}{V_d}J_d^b, \quad (31)$$

$$\frac{dc_{sl}}{dt} = \frac{1}{V_{sl}}(J_e^{sl} - J_{sl}^c - J_{sl}^b + J_s^{sl}), \quad \frac{db_{sl}}{dt} = \frac{1}{V_{sl}}J_{sl}^b, \quad (32)$$

$$\frac{dc_c}{dt} = \frac{1}{V_c}(J_{sl}^c + J_d^c - J_c^n - J_c^b), \quad \frac{db_c}{dt} = \frac{1}{V_c}J_c^b, \quad (33)$$

$$\frac{dc_s}{dt} = \frac{1}{V_s}(J_n^s - J_s^{sl} - J_s^b), \quad \frac{db_s}{dt} = \frac{1}{V_s}J_s^b, \quad (34)$$

$$\frac{dc_n}{dt} = \frac{1}{V_n}(J_c^n - J_n^s). \quad (35)$$

Here,  $c_d$  is the concentration of free calcium in the dyad,  $b_d$  is the concentration of calcium bound to a buffer in the dyad,  $c_{sl}$  is the concentration of free calcium in the sub-sarcolemmal (SL) compartment,  $b_{sl}$  is the concentration of calcium bound to a buffer in the SL compartment,  $c_c$  is the concentration of free calcium in the bulk cytosol,  $b_c$  is the concentration of calcium bound to a buffer in the bulk cytosol,  $c_s$  is the concentration of free calcium in the junctional sarcoplasmic reticulum (jSR) compartment,  $b_s$  is the concentration of calcium bound to a buffer in the jSR, and  $c_n$  is the concentration of free calcium in the network sarcoplasmic reticulum (nSR) compartment. Below, each of the calcium fluxes will be specified.

#### S1.3.1 Flux through the SERCA pumps

The formulation of the flux from the bulk cytosol to the nSR through the SERCA pumps is based on [2] and is expressed by

$$J_c^n = \bar{J}_{\text{SERCA}} \frac{\left(\frac{c_c}{K_c}\right)^2 - \left(\frac{c_n}{K_n}\right)^2}{1 + \left(\frac{c_c}{K_c}\right)^2 + \left(\frac{c_n}{K_n}\right)^2}. \quad (36)$$

**Flux through the RyRs** The flux from the jSR to the SL compartment is given by

$$J_s^{sl} = J_{\text{RyR}} + J_{\text{leak}}, \quad (37)$$

where  $J_{\text{RyR}}$  is flux through active RyR channels and  $J_{\text{leak}}$  is flux through RyR channels that are always open, given by

$$J_{\text{RyR}} = p \cdot r \cdot \alpha_{\text{RyR}}(c_s - c_{sl}), \quad (38)$$

$$J_{\text{leak}} = \gamma_{\text{RyR}} \cdot \alpha_{\text{RyR}}(c_s - c_{sl}), \quad (39)$$

respectively. Here,  $p$  represents the open probability of the active RyR channels, and this is given by

$$p = \frac{c_d^3}{c_d^3 + \kappa_{\text{RyR}}^3}. \quad (40)$$

Furthermore,  $r$  is the fraction of RyR channels that are not inactivated and is governed by the equation

$$\frac{dr}{dt} = -\frac{J_{\text{RyR}}}{\beta_{\text{RyR}}} + \frac{\eta_{\text{RyR}}}{p}(1 - r). \quad (41)$$

See [1] for a derivation of these expressions.

### S1.3.2 Passive diffusion fluxes between compartments

The formulation of the passive diffusion fluxes between compartments are based on e.g. [2], and the fluxes are given by

$$J_d^c = \alpha_d^c(c_d - c_c), \quad (42)$$

$$J_{sl}^c = \alpha_{sl}^c(c_{sl} - c_c), \quad (43)$$

$$J_n^s = \alpha_n^s(c_n - c_s). \quad (44)$$

### S1.3.3 Buffer fluxes

The formulation of the fluxes of free calcium binding to a calcium buffer are based on e.g. [2], and the fluxes are given by

$$J_d^b = V_d(k_{\text{on}}^d c_d (B_{\text{tot}}^d - b_d) - k_{\text{off}}^d b_d), \quad (45)$$

$$J_{sl}^b = V_{sl}(k_{\text{on}}^{sl} c_{sl} (B_{\text{tot}}^{sl} - b_{sl}) - k_{\text{off}}^{sl} b_{sl}), \quad (46)$$

$$J_c^b = V_c(k_{\text{on}}^c c_c (B_{\text{tot}}^c - b_c) - k_{\text{off}}^c b_c), \quad (47)$$

$$J_s^b = V_s(k_{\text{on}}^s c_s (B_{\text{tot}}^s - b_s) - k_{\text{off}}^s b_s). \quad (48)$$

### S1.3.4 Membrane fluxes

The membrane fluxes,  $J_{\text{CaL}}$ ,  $J_{\text{bCa}}$ ,  $J_{\text{pCa}}$ , and  $J_{\text{NaCa}}$ , are given by

$$J_{\text{CaL}} = -\frac{\chi C_m}{2F} I_{\text{CaL}}, \quad J_{\text{pCa}} = -\frac{\chi C_m}{2F} I_{\text{pCa}}, \quad (49)$$

$$J_{\text{bCa}} = -\frac{\chi C_m}{2F} I_{\text{bCa}}, \quad J_{\text{NaCa}} = \frac{\chi C_m}{F} I_{\text{NaCa}}, \quad (50)$$

(see [1]). Here,  $I_{\text{CaL}}$ ,  $I_{\text{bCa}}$ ,  $I_{\text{pCa}}$ , and  $I_{\text{NaCa}}$  are defined by the expressions given above. Note also that  $J_e^{sl}$  is defined by

$$J_e^{sl} = J_{\text{NaCa}} + J_{\text{pCa}} + J_{\text{bCa}}. \quad (51)$$

## S1.4 Nernst equilibrium potentials

The Nernst equilibrium potentials for the different types of ion channels are defined as

$$E_{\text{Na}} = \frac{RT}{F} \log \left( \frac{[\text{Na}^+]_e}{[\text{Na}^+]_i} \right), \quad (52)$$

$$E_{\text{Ca}} = \frac{RT}{2F} \log \left( \frac{[\text{Ca}^{2+}]_e}{c_{sl}} \right), \quad (53)$$

$$E_{\text{K}} = \frac{RT}{F} \log \left( \frac{[\text{K}^+]_e}{[\text{K}^+]_i} \right), \quad (54)$$

$$E_{\text{Ks}} = \frac{RT}{F} \log \left( \frac{[\text{K}^+]_e + 0.018[\text{Na}^+]_e}{[\text{K}^+]_i + 0.018[\text{Na}^+]_i} \right), \quad (55)$$

$$E_{\text{Cl}} = \frac{RT}{F} \log \left( \frac{[\text{Cl}^-]_e}{[\text{Cl}^-]_i} \right), \quad (56)$$

$$E_f = -17 \text{ mV}, \quad (57)$$

for the parameter values given in Table S2.



| Parameter | Description                            | Value                  |
|-----------|----------------------------------------|------------------------|
| $V_d$     | Volume fraction of the dyadic subspace | 0.001                  |
| $V_{sl}$  | Volume fraction of the SL compartment  | 0.028                  |
| $V_c$     | Volume fraction of the bulk cytosol    | 0.917                  |
| $V_s$     | Volume fraction of the jSR             | 0.004                  |
| $V_n$     | Volume fraction of the nSR             | 0.05                   |
| $\chi$    | Cell surface to volume ratio           | $0.9 \mu\text{m}^{-1}$ |

Table S1: Geometry parameters of the hiPSC-CM base model.

| Parameter            | Description                                  | Value                            |
|----------------------|----------------------------------------------|----------------------------------|
| $C_m$                | Specific membrane capacitance                | $0.01 \mu\text{F}/\mu\text{m}^2$ |
| $F$                  | Faraday's constant                           | 96.485 C/mmol                    |
| $R$                  | Universal gas constant                       | 8.314 J/(mol·K)                  |
| $T$                  | Temperature                                  | 310 K                            |
| $[\text{Ca}^{2+}]_e$ | Extracellular $\text{Ca}^{2+}$ concentration | 0.42 mM                          |
| $[\text{Na}^+]_e$    | Extracellular sodium concentration           | 140 mM                           |
| $[\text{Na}^+]_i$    | Intracellular sodium concentration           | 8 mM                             |
| $[\text{K}^+]_e$     | Extracellular potassium concentration        | 5 mM                             |
| $[\text{K}^+]_i$     | Intracellular potassium concentration        | 120 mM                           |
| $[\text{Cl}^-]_e$    | Extracellular chloride concentration         | 150 mM                           |
| $[\text{Cl}^-]_i$    | Intracellular chloride concentration         | 15 mM                            |

Table S2: Physical constants and ionic concentrations of the base model.

| Parameter              | Value                         | Parameter                | Value                          |
|------------------------|-------------------------------|--------------------------|--------------------------------|
| $g_{\text{Na}}$        | 2.6 mS/ $\mu\text{F}$         | $g_{\text{CaL}}$         | 1.8 nL/( $\mu\text{F}$ ms)     |
| $g_{\text{NaL}}$       | 0.03 mS/ $\mu\text{F}$        | $g_{\text{bCa}}$         | 0.0005 mS/ $\mu\text{F}$       |
| $g_{\text{to}}$        | 0.21 mS/ $\mu\text{F}$        | $\bar{I}_{\text{NaCa}}$  | 9.4 $\mu\text{A}/\mu\text{F}$  |
| $g_{\text{Kr}}$        | 0.075 mS/ $\mu\text{F}$       | $\bar{I}_{\text{pCa}}$   | 0.12 $\mu\text{A}/\mu\text{F}$ |
| $g_{\text{Ks}}$        | 0.0127 mS/ $\mu\text{F}$      | $\bar{J}_{\text{SERCA}}$ | 0.00016 mM/ms                  |
| $g_{\text{Kl}}$        | 0.05 mS/ $\mu\text{F}$        | $\alpha_{\text{RyR}}$    | 0.0052 ms <sup>-1</sup>        |
| $g_{\text{f}}$         | 0.012 mS/ $\mu\text{F}$       | $\alpha_d^c$             | 0.0027 ms <sup>-1</sup>        |
| $g_{\text{bCl}}$       | 0.0001 mS/ $\mu\text{F}$      | $\alpha_{sl}^c$          | 0.3 ms <sup>-1</sup>           |
| $\bar{I}_{\text{NaK}}$ | 1.9 $\mu\text{A}/\mu\text{F}$ | $\alpha_n^s$             | 0.0093 ms <sup>-1</sup>        |

Table S3: Conductance values and similar parameters for each of the membrane currents and intracellular calcium fluxes of the hiPSC-CM base model.

| Parameter             | Flux             | Value                    |
|-----------------------|------------------|--------------------------|
| $K_c$                 | $J_c^n$          | 0.00025 mM               |
| $K_n$                 | $J_c^n$          | 1.7 mM                   |
| $\beta_{\text{RyR}}$  | $J_s^{sl}$       | 0.0265 mM                |
| $\gamma_{\text{RyR}}$ | $J_s^{sl}$       | 0.001                    |
| $\kappa_{\text{RyR}}$ | $J_{\text{RyR}}$ | 0.015 mM                 |
| $\eta_{\text{RyR}}$   | $J_s^{sl}$       | 0.00001 ms <sup>-1</sup> |

Table S4: Remaining parameters for the intracellular calcium fluxes of the base model.

| Parameter                      | Current           | Value      |
|--------------------------------|-------------------|------------|
| $k_{\text{sat}}$               | $I_{\text{NaCa}}$ | 0.3        |
| $\nu$                          | $I_{\text{NaCa}}$ | 0.3        |
| $K_{\text{act}}$               | $I_{\text{NaCa}}$ | 0.00015 mM |
| $K_{\text{Ca},i}$              | $I_{\text{NaCa}}$ | 0.0036 mM  |
| $K_{\text{Ca},e}$              | $I_{\text{NaCa}}$ | 1.3 mM     |
| $K_{\text{Na},i}$              | $I_{\text{NaCa}}$ | 12.3 mM    |
| $K_{\text{Na},e}$              | $I_{\text{NaCa}}$ | 87.5 mM    |
| $K_{\text{Na},i}^{\text{NaK}}$ | $I_{\text{NaK}}$  | 11 mM      |
| $K_{\text{K},e}$               | $I_{\text{NaK}}$  | 1.5 mM     |
| $K_{\text{pCa}}$               | $I_{\text{pCa}}$  | 0.0005 mM  |

Table S5: Remaining parameters for the membrane currents of the base model.

| Parameter             | Compartment          | Value                               |
|-----------------------|----------------------|-------------------------------------|
| $B_{\text{tot}}^c$    | Bulk cytosol         | 0.063 mM                            |
| $k_{\text{on}}^c$     | Bulk cytosol         | $40 \text{ ms}^{-1}\text{mM}^{-1}$  |
| $k_{\text{off}}^c$    | Bulk cytosol         | $0.03 \text{ ms}^{-1}$              |
| $B_{\text{tot}}^d$    | Dyad                 | 2.7 mM                              |
| $k_{\text{on}}^d$     | Dyad                 | $100 \text{ ms}^{-1}\text{mM}^{-1}$ |
| $k_{\text{off}}^d$    | Dyad                 | $1 \text{ ms}^{-1}$                 |
| $B_{\text{tot}}^{sl}$ | Subsarcolemmal space | 1.45 mM                             |
| $k_{\text{on}}^{sl}$  | Subsarcolemmal space | $100 \text{ ms}^{-1}\text{mM}^{-1}$ |
| $k_{\text{off}}^{sl}$ | Subsarcolemmal space | $0.15 \text{ ms}^{-1}$              |
| $B_{\text{tot}}^s$    | Junctional SR        | 60 mM                               |
| $k_{\text{on}}^s$     | Junctional SR        | $100 \text{ ms}^{-1}\text{mM}^{-1}$ |
| $k_{\text{off}}^s$    | Junctional SR        | $65 \text{ ms}^{-1}$                |

Table S6: Parameters for the  $\text{Ca}^{2+}$  buffers of the base model.

| Current          | Gate             | $z_\infty$                                                   | $\alpha_z$                                                                                                                                                               | $\beta_z$                                                                                                                                                      | $\tau_z$                                               |
|------------------|------------------|--------------------------------------------------------------|--------------------------------------------------------------------------------------------------------------------------------------------------------------------------|----------------------------------------------------------------------------------------------------------------------------------------------------------------|--------------------------------------------------------|
| $I_{\text{Na}}$  | $m$              | $\frac{1}{(1 + e^{-(v-57-v)/9})^2}$                          | $0.13e^{-((v+46)/16)^2}$                                                                                                                                                 | $0.06e^{-((v-5)/51)^2}$                                                                                                                                        | $\alpha_m + \beta_m$                                   |
|                  | $j$              | $\frac{1}{(1 + e^{(v+72)/7})^2}$                             | $\begin{cases} 0, & \text{if } v \geq -40 \\ \frac{-2.5 \cdot 10^4 e^{0.2v}}{-7 \cdot 10^{-6} e^{-0.04v}} (v + 38) \\ 1 + e^{0.3(v+79)}, & \text{otherwise} \end{cases}$ | $\begin{cases} \frac{0.6e^{0.06v}}{1 + e^{-0.1(v+32)}}, & \text{if } v \geq -40 \\ \frac{0.02e^{-0.01v}}{1 + e^{-0.14(v+40)}}, & \text{otherwise} \end{cases}$ | $\frac{1}{\alpha_j + \beta_j}$                         |
| $I_{\text{NaL}}$ | $m_L$            | $\frac{1}{1 + e^{-(v-43-v)/5}}$                              | $\frac{1}{6.8e^{(v+12)/35}}$                                                                                                                                             | $8.6e^{-(v+77)/6}$                                                                                                                                             | $\alpha_m + \beta_m$                                   |
|                  | $h_L$            | $\frac{1}{1 + e^{(v+88)/7.5}}$                               |                                                                                                                                                                          |                                                                                                                                                                | 200 ms                                                 |
| $I_{\text{CaL}}$ | $d$              | $\frac{1}{1 + e^{-(v+5)/6}}$                                 | $\frac{1 - e^{-\frac{v+5}{6}}}{0.035(v+5)}$                                                                                                                              |                                                                                                                                                                | $\alpha_d d_\infty$                                    |
|                  | $f$              | $\frac{1}{1 + e^{(v+35)/9}} + \frac{0.6}{1 + e^{(50-v)/20}}$ | $\frac{1}{0.02e^{-(0.034(v+14.5)^2)} + 0.02}$                                                                                                                            |                                                                                                                                                                | $\alpha_f$                                             |
|                  | $f_{\text{Ca}}$  | $\frac{1.7c_d}{1.7c_d + 0.012}$                              | $\frac{1}{1.7c_d + 0.012}$                                                                                                                                               |                                                                                                                                                                | $\alpha_{\text{Ca}}$                                   |
| $I_{\text{to}}$  | $q_{\text{to}}$  | $\frac{1}{1 + e^{(v+53)/13}}$                                | $\frac{39}{0.57e^{-0.08(v+44)} + 0.065e^{0.1(v+46)}}$                                                                                                                    | 6                                                                                                                                                              | $\alpha_{q_{\text{to}}} + \beta_{q_{\text{to}}}$       |
|                  | $r_{\text{to}}$  | $\frac{1}{1 + e^{-(v-22.3)/18.75}}$                          | $\frac{14.4}{e^{0.09(v+30.61)} + 0.37e^{-0.12(v+24)}}$                                                                                                                   | 2.75                                                                                                                                                           | $\alpha_{r_{\text{to}}} + \beta_{r_{\text{to}}}$       |
| $I_{\text{Kr}}$  | $x_{\text{Kr1}}$ | $\frac{1}{1 + e^{-(v+20.7)/4.9}}$                            | $\frac{450}{1 + e^{-(v+45)/10}}$                                                                                                                                         | $\frac{6}{1 + e^{(v+30)/11.5}}$                                                                                                                                | $\alpha_{x_{\text{Kr1}}} \cdot \beta_{x_{\text{Kr1}}}$ |
|                  | $x_{\text{Kr2}}$ | $\frac{1}{1 + e^{(v+88)/50}}$                                | $\frac{3}{1 + e^{-(v+60)/20}}$                                                                                                                                           | $\frac{1.12}{1 + e^{(v-60)/20}}$                                                                                                                               | $\alpha_{x_{\text{Kr2}}} \cdot \beta_{x_{\text{Kr2}}}$ |
| $I_{\text{Ks}}$  | $x_{\text{Ks}}$  | $\frac{1}{1 + e^{-(v+3.8)/14}}$                              | $\frac{990}{1 + e^{-(v+2.4)/14}}$                                                                                                                                        |                                                                                                                                                                | $\alpha_{x_{\text{Ks}}}$                               |
| $I_{\text{f}}$   | $x_{\text{f}}$   | $\frac{1}{1 + e^{(v+78)/5}}$                                 | $\frac{1900}{1 + e^{(v+15)/10}}$                                                                                                                                         |                                                                                                                                                                | $\alpha_{x_{\text{Ks}}}$                               |

Table S7: Specification of the parameters  $z_\infty$  and  $\tau_z$ , for  $z = m, j, m_L, h_L, d, f, f_{\text{Ca}}, q_{\text{to}}, r_{\text{to}}, x_{\text{Kr1}}, x_{\text{Kr2}}, x_{\text{Ks}}$  and  $x_{\text{f}}$  in the equations for the gating variables of the form (6).

## References

- [1] Karoline Horgmo Jæger, Verena Charwat, Bérénice Charrez, Henrik Finsberg, Mary M Maleckar, Sam Wall, Kevin Healy, and Aslak Tveito. Improved computational identification of drug response using optical measurements of human stem cell derived cardiomyocytes in microphysiological systems. *bioRxiv*, page 787390, 2019.
- [2] Eleonora Grandi, Francesco S Pasqualini, and Donald M Bers. A novel computational model of the human ventricular action potential and Ca transient. *Journal of Molecular and Cellular Cardiology*, 48(1):112–121, 2010.
- [3] Thomas O’Hara, László Virág, András Varró, and Yoram Rudy. Simulation of the undiseased human cardiac ventricular action potential: Model formulation and experimental validation. *PLoS Computational Biology*, 7(5):e1002061, 2011.
- [4] Michelangelo Paci, Jari Hyttinen, Katriina Aalto-Setälä, and Stefano Severi. Computational models of ventricular-and atrial-like human induced pluripotent stem cell derived cardiomyocytes. *Annals of Biomedical Engineering*, 41(11):2334–2348, 2013.
